# Supplementary figures and images for: H2O2:HCl Catalyzed Synthesis of 5-(3-Substituted-Thiophene) Pyrimidine Derivatives and Evaluation for Their Pharmacological Effects
Source: Research Square preprint supplement (doi:10.21203/rs.3.rs-503158/v1), 2021-05-13

**
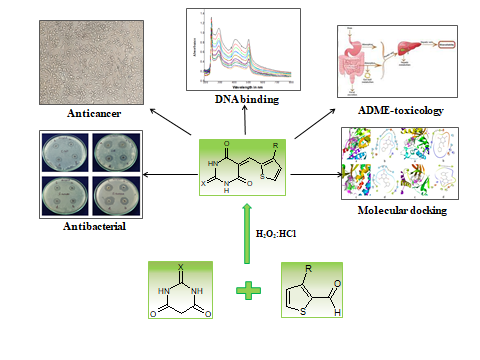
**

**Graphical representation**

Supplement: Supplementary file 1 [file 6b555e7cdc4793d53b8e6d76.docx]
